# Supplementary material for: Blood glucose, insulin and glycogen profiles in Sprague-Dawley rats co-infected with Plasmodium berghei ANKA and Trichinella zimbabwensis
Source: PeerJ. 2022 Jul 29;10:e13713. doi: 10.7717/peerj.13713 (PMC9341445; doi:10.7717/peerj.13713)
Supplement: Supplemental Information 1 [file peerj-10-13713-s001.xlsx]

## Sheet: CONTROL GROUP-BLOOD GLUCOSE
Day post infection	Control
0	5.8	5.8	6	5.5	5.1	5	6.5	5.5	6.9	5.7	5.9	6	4.7	6.3	5.3	5.5	5.6	6
7							6.7	6.3	6	6.5	5.8	6.4	6.3	7	5.8	6	6	5.4
14													5.7	5.9	4	5.3	5.5	5.8

## Sheet: Pb GROUP-BLOOD GLUCOSE
Day post infection	Malaria
0	5.7	5	5.5	5.6	5.4	5.6	5.6	5	7.3	6.2	5.8	4.8	6.4	6.2	5.7	6.5	6.1	5.7
7							6.3	2.7	2.4	7.7	0	5.8	5.5	7.3	5	6.3	4.6	5.9
14							4.3	3.5	0	6	0	4.7

## Sheet: Tz GROUP-BLOOD GLUCOSE
		Day post infection	Trichinella
		0	5.7	6.7	5.3	6	7	5.2	5.6	5.7	5.9	5.4	5.5	5.5	6.2	4.9	5.9	5	6	5.4
		7							4.1	4.2	4.8	5	4.6	4.1	6.5	4.4	6.1	6.3	7.2	5.7
		14													4.9	4.4	5.5	6.2	6	5.5

## Sheet: Pb + Tz GROUP BLOOD GLUCOSE
Day post infection	Malaria + Trichinella
0	5.6	5.2	4.8	6.4	6	5.5	5.7	5.3	6.4	5.8	6.3	4.6	5.9	6	4.9	5.6	5.3	5.3
7							5.2	5.5	5.5	5.4	5.1	5.4	6	6.8	5.2	5.4	6	4.9
14													5.7	5.7	5.6	4.9	5.6	4.8

## Sheet: CONTROL GROUP-INSULIN
Days post infection	Control
0	21.23	76.9	36.89	20.35	17.75	22.62
7	21.23	76.9	36.89	20.35	17.75	22.62
14	21.23	76.9	36.89	20.35	17.5	22.62

## Sheet: Pb GROUP-INSULIN
Days post infection	Malaria
0	21.23	76.9	36.89	20.35	17.75	22.62
7	17.57	33.756	11.66	46.63	0	37.76
14	0	31.32	17.23	23.84	12.53	14.62

## Sheet: Tz GROUP-INSULIN
Days post infection	Trichinella
0	2.61	2.95	2.09	2.78	2.61	7.83
7	2.26	4.178	2.26	4.52	10.79	70.99
14	24.89	14.27	16.53	53.59	29.23	36.192

## Sheet: Pb + Tz GROUP INSULIN
Days post infection	Malaria + Trichinella
0	2.61	2.95	2.09	2.78	2.61	7.83
7	4	3.31	14.616	2.26	6.79	12.35
14	23.49	16.53	6.96	18.79	18.44	37.41

## Sheet: LIVER GLYCOGEN CONCENTRATION
Days post infection	Control						Malaria						Trichinella						Malaria + Trichinella
0	0.732	0.729	0.482	0.543	0.792	0.767	0.605	0.941	0.534	0.418	0.887	0.513	0.456	0.719	0.712	0.834	0.443	0.56	0.413	0.763	0.89	0.414	0.658	0.697
7	0.543	0.575	0.792	0.497	0.681	0.731	0.414	0.653	0.735	0.643	0.71	0.584	0.327	0.151	0.338	0.216	0.235	0.331	0.348	0.382	0.258	0.386	0.281	0.439
14	0.409	0.818	0.439	0.771	0.573	0.688	0.748	0.499	0.767	0.539	0.449	0.667	0.67	0.569	0.6	0.596	0.479	0.461	0.59	0.282	0.285	0.417	0.516	0.171

## Sheet: MUSCLE GLYCOGEN CONCENTRATION
Days post infection	Trichinella						Malaria +Trichinella
0	0.109	0.113	0.083	0.117	0.165	0.108	0.13	0	0.143	0.162	0.171	0.125
7	0.118	0.164	0.194	0.126	0.208	0.298	0.28	0.228	0.269	0.125	0.354	0.21
14	0.18	0.182	0.184	0.212	0.224	0.185	0.273	0.352	0.147	0.3	0.236	0.367
